# Supplementary material for: Long-term surveillance defines spatial and temporal patterns implicating Culex tarsalis as the primary vector of West Nile virus
Source: PubMed Central journal article supplement (PMC6488619; doi:10.1038/s41598-019-43246-y), 2019-04-29
Supplement: 41598_2019_43246_MOESM1_ESM.pdf [file 41598_2019_43246_MOESM1_ESM.pdf]

1 **Supplemental Data**

2 **Long-term surveillance defines spatial and temporal patterns**  
3 **implicating *Culex tarsalis* as the primary vector of West Nile virus**

4 Brendan M. Dunphy<sup>1</sup>, Kristofer B. Kovach<sup>1</sup>, Ella J. Gehrke<sup>1</sup>, Eleanor N. Field<sup>1</sup>, Wayne A.  
5 Rowley<sup>1</sup>, Lyric C. Bartholomay<sup>2</sup>, and Ryan C. Smith<sup>1\*</sup>

6 <sup>1</sup> Department of Entomology, Iowa State University, Ames, Iowa, 50011, USA

7 <sup>2</sup> Department of Pathobiological Sciences, University of Wisconsin, Madison, WI 53706

8 \*Correspondence: smithr@iastate.edu

9  
10  
11  
12  
13  
14  
15  
16  
17  
18  
19  
20  
21  
22  
23  
24  
25  
26  
27

**Supplemental Information**

**Supplemental Tables**

**Table S1.** Summary of combined WNV+ pools for *Culex* species in Iowa, 2002-2016.

**Supplemental Figures**

**Figure S1.** Identification of *Culex pipiens* group blood meals by species.

28

| Species                  | # Specimens tested | # Pools tested | # pools WNV+ | MIR  |
|--------------------------|--------------------|----------------|--------------|------|
| <i>Cx. erraticus</i>     | 4585               | 283            | 6            | 1.31 |
| <i>Cx. pipiens</i> group | 129763             | 4888           | 241          | 1.86 |
| <i>Cx. tarsalis</i>      | 22863              | 731            | 46           | 2.01 |

29

30 **Table S1. Summary of combined WNV+ pools for *Culex* species in Iowa, 2002-2016.**

31 Mosquito number, pools tested, and WNV+ pools for each *Culex* species in Iowa.

32 Minimum infection rate (MIR) was calculated as a bias-corrected maximum likelihood  
33 estimate.

34

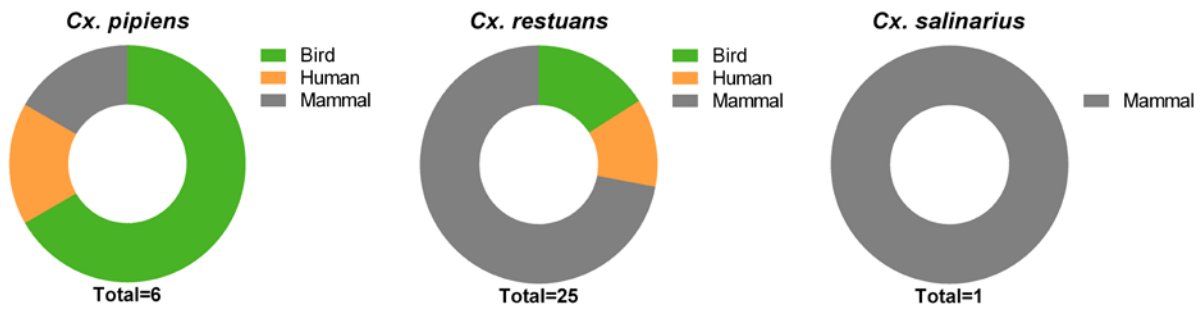

35 **Figure S1. Identification of *Culex pipiens* group blood meals by species.**  
 36 *Culex pipiens* group mosquito samples in which the blood meal source was identified  
 37 were further speciated to confirm if the sample was *Cx. pipiens*, *Cx. restuans*, or *Cx.*  
 38 *salinarius*. The percentage of blood meals taken respectively from birds, humans, and  
 39 non-human mammals are displayed for each mosquito species. The total number (n) of  
 40 identified blood meals is displayed below.  
 41

42

43

44

45

46
